# Supplementary material
Source: MDPI journal article supplement (https://www.mdpi.com/2071-1050/14/14/8306)
Supplement: s1 [file s1]

**Table S1: Highlighted main findings sources from the Literature Systematic Review**

This annex shows some of the articles analysed from the content analysis sample of 296 articles. Concretely, the table shows the most relevant references from the content analysis as well as the referenced in the article and that were analysed in the content analysis.

---

### Literature Review

---

- Binswanger, M. Is There a Growth Imperative in Capitalist Economies? A Circular Flow Perspective. *Journal of Post Keynesian Economics* 2009, 31, doi:10.2753/PKE0160-3477310410.
- Blomsma, F.; Brennan, G. The Emergence of Circular Economy: A New Framing Around Prolonging Resource Productivity. *Journal of Industrial Ecology* 2017, 21, 603–614, doi:10.1111/jiec.12603.
- del Carmen Diaz-Pena, L.; Angel Tinoco-Castrejon, M. The Urban Solid Wastes Management in Cuautlancingo, Puebla, Towards a Circular Economy: Social and Economic Impacts of CE to the Region - Innovative Business Models. In *TOWARDS ZERO WASTE: CIRCULAR ECONOMY BOOST, WASTE TO RESOURCES*; FrancoGarcia, M.L., CarpioAguilar, J.C., Bressers, H., Eds.; Greening of Industry Networks Studies; 2019; Cham, Switzerland. Vol. 6, pp. 105–120 ISBN 978-3-319-92931-6; 978-3-319-92930-9.
- Chen, J.Z. Material Flow and Circular Economy. *Systems Research and Behavioral Science* 2009, 26, 269–278, doi:10.1002/sres.968.
- D'Amato, D.; Droste, N.; Allen, B.; Kettunen, M.; Lhtinen, K.; Korhonen, J.; Leskinen, P.; Matthies, B.D.; Toppinen, A. Green, Circular, Bio Economy: A Comparative Analysis of Sustainability Avenues. *Journal of Cleaner Production* 2017, 168, 716–734, doi:10.1016/j.jclepro.2017.09.053.
- Elia, V.; Gnoni, M.G.; Tornese, F. Measuring Circular Economy Strategies through Index Methods: A Critical Analysis. *Journal of Cleaner Production* 2017, 142, 2741–2751, doi:10.1016/j.jclepro.2016.10.196.
- Ertz, M.; Leblanc-Proulx, S.; Sarigollu, E.; Morin, V. Advancing Quantitative Rigor in the Circular Economy Literature: New Methodology for Product Lifetime Extension Business Models. *RESOURCES CONSERVATION AND RECYCLING* 2019, 150, doi:10.1016/j.resconrec.2019.104437.
- Friant, M.C.; Vermeulen, W.J.V.; Salomone, R. Analysing European Union Circular Economy Policies: Words versus Actions. *Sustainable Production and Consumption* 2020, doi:10.1016/j.spc.2020.11.001.
- Halstenberg, F.A.; Lindow, K.; Stark, R. Leveraging Circular Economy through a Methodology for Smart Service Systems Engineering. *SUSTAINABILITY* 2019, 11, doi:10.3390/su11133517.
- Hobson, K.; Lynch, N. Diversifying and De-Growing the Circular Economy: Radical Social Transformation in a Resource-Scarce World. *Futures* 2016, 82, 15–25, doi:10.1016/j.futures.2016.05.012.
- den Hollander, M.C.; Bakker, C.A.; Hultink, E.J. Product Design in a Circular Economy: Development of a Typology of Key Concepts and Terms. *Journal of Industrial Ecology* 2017, 21, doi:10.1111/jiec.12610.
- Johansson, N.; Henriksson, M. Circular Economy Running in Circles? A Discourse Analysis of Shifts in Ideas of Circularity in Swedish Environmental Policy. *Sustainable Production and Consumption* 2020, 23, doi:10.1016/j.spc.2020.05.005.
- Kristensen, D.K.; Kjeldsen, C.; Thorse, M.H. Enabling Sustainable Agro-Food Futures: Exploring Fault Lines and Synergies Between the Integrated Territorial Paradigm, Rural Eco-Economy and Circular Economy. *Journal of Agricultural and Environmental Ethics* 2016, 29, 749–765, doi:10.1007/s10806-016-9632-9.
- Kunz, N.; Mayers, K.; van Wassenhove, L.N. Stakeholder Views on Extended Producer Responsibility and the Circular Economy. *California Management Review* 2018, 60, 45–70, doi:10.1177/0008125617752694.
- Lazarevic, D.; Valve, H. Narrating Expectations for the Circular Economy: Towards a Common and Contested European Transition. *Energy Research and Social Science* 2017, 31, 60–69, doi:10.1016/j.erss.2017.05.006.
- Li, X.L.; Yang, C.Z. ECOLOGICAL ECONOMICS FOR ENERGY CONSERVATION AND EMISSION REDUCTION OF HIGH ENERGY CONSUMING INDUSTRIES BASED ON THEORY OF CIRCULAR ECONOMY. *APPLIED ECOLOGY AND ENVIRONMENTAL RESEARCH* 2019, 17, 14587–14598, doi:10.15666/aeer/1706\_1458714598.
- Liu, D.; Li, H.; Wang, W.; Dong, Y. Constructivism Scenario Evolutionary Analysis of Zero Emission Regional Planning: A Case of Qaidam Circular Economy Pilot Area in China. *International Journal of Production Economics* 2012, 140, 341–356, doi:10.1016/j.ijpe.2011.04.008.
- Liu, Q.; ming Li, H.; li Zuo, X.; fei Zhang, F.; Wang, L. A Survey and Analysis on Public Awareness and Performance for Promoting Circular Economy in China: A Case Study from Tianjin. *Journal of Cleaner Production* 2009, 17, 265–270, doi:10.1016/j.jclepro.2008.06.003.
- Macura, B.; Piniewski, M.; Ksiezniak, M.; Osuch, P.; Haddaway, N.R.; Ek, F.; Andersson, K.; Tattari, S. Effectiveness of Ecotechnologies in Agriculture for the Recovery and Reuse of Carbon and Nutrients in the Baltic and Boreo-Temperate Regions: A Systematic Map. *ENVIRONMENTAL EVIDENCE* 2019, 8, doi:10.1186/s13750-019-0183-1.
- Maillefert, M.; Robert, I. Nouveaux Modeles conomiques et Creation de Valeur Territoriale Autour de l'conomie Circulaire, de l'conomie de La Fonctionnalit et de l'cologie Industrielle. *Revue d'conomie Rgionale & Urbaine* 2017, Dcembr, 905, doi:10.3917/reru.175.0905.
- Martins, N.O. Ecosystems, Strong Sustainability and the Classical Circular Economy. *Ecological Economics* 2016, 129, 32–39, doi:10.1016/j.ecolecon.2016.06.003.
-

- Mayer, A.; Haas, W.; Wiedenhofer, D.; Krausmann, F.; Nuss, P.; Blengini, G.A. Measuring Progress towards a Circular Economy: A Monitoring Framework for Economy-Wide Material Loop Closing in the EU28. *JOURNAL OF INDUSTRIAL ECOLOGY* 2019, 23, 62–76, doi:10.1111/jiec.12809.
- Millar, N.; McLaughlin, E.; Börger, T. The Circular Economy: Swings and Roundabouts? *Ecological Economics* 2019, 158, 11–19.
- Moreau, V.; Sahakian, M.; van Griethuysen, P.; Vuille, F. Coming Full Circle: Why Social and Institutional Dimensions Matter for the Circular Economy. *Journal of Industrial Ecology* 2017, 21, 497–506, doi:10.1111/jiec.12598.
- Morseletto, P. Targets for a Circular Economy. *Resources, Conservation and Recycling* 2020, 153, 104553, doi:10.1016/j.resconrec.2019.104553.
- Murray, A.; Skene, K.; Haynes, K. The Circular Economy: An Interdisciplinary Exploration of the Concept and Application in a Global Context. *Journal of Business Ethics* 2017, 140, 369–380, doi:10.1007/s10551-015-2693-2.
- Naustdalslid, J. Circular Economy in China - The Environmental Dimension of the Harmonious Society. *International Journal of Sustainable Development and World Ecology* 2014, 21, 303–313, doi:10.1080/13504509.2014.914599.
- Nobre, G.C.; Tavares, E. Scientific Literature Analysis on Big Data and Internet of Things Applications on Circular Economy: A Bibliometric Study. *Scientometrics* 2017, 111, 463–492, doi:10.1007/s11192-017-2281-6.
- Pauliuk, S. Critical Appraisal of the Circular Economy Standard BS 8001:2017 and a Dashboard of Quantitative System Indicators for Its Implementation in Organizations. *Resources, Conservation and Recycling* 2018, 129, 81–92, doi:10.1016/j.resconrec.2017.10.019.
- Pakhomova, N. v.; Richter, K.K.; Vetrova, M.A. Transition to Circular Economy and Closedloop Supply Chains as Driver of Sustainable Development. *St Petersburg University Journal of Economic Studies* 2017, 33, 244–268, doi:10.21638/11701/spbu05.2017.203.
- Pollard, S.; Turney, A.; Charnley, F.; Webster, K. The Circular Economy - a Reappraisal of the 'stuff' We Love. *Geography* 2016, 101, 17–27.
- Pomponi, F.; Moncaster, A. Circular Economy for the Built Environment: A Research Framework. *Journal of Cleaner Production* 2017, 143, 710–718, doi:10.1016/j.jclepro.2016.12.055.
- Puntillo, P.; Gulluscio, C.; Huisingh, D.; Veltri, S. Reevaluating Waste as a Resource under a Circular Economy Approach from a System Perspective: Findings from a Case Study. *BUSINESS STRATEGY AND THE ENVIRONMENT* 2021, 30, 968–984, doi:10.1002/bse.2664.
- Smart, P.; Hemel, S.; Lettice, F.; Adams, R.; Evans, S. International Journal of Operations & Production Management Pre-Paradigmatic Status of Industrial Sustainability: A Systematic Review (2017) "Pre- Paradigmatic Status of Industrial Sustainability: A Systematic Review." *International Journal of Operations & Production Management* 37, 1425–1450.
- Tavares, T.M.; Godinho Filho, M.; Ganga, G.D.; Calfe, M.H. THE RELATIONSHIP BETWEEN ADDITIVE MANUFACTURING AND CIRCULAR ECONOMY: A SISTEMATIC REVIEW. *INDEPENDENT JOURNAL OF MANAGEMENT & PRODUCTION* 2020, 11, 1647–1665, doi:10.14807/ijmp.v11i5.1290.
- Tisserant, A.; Pauliuk, S.; Merciai, S.; Schmidt, J.; Fry, J.; Wood, R.; Tukker, A. Solid Waste and the Circular Economy: A Global Analysis of Waste Treatment and Waste Footprints. *Journal of Industrial Ecology* 2017, 21, 628–640, doi:10.1111/jiec.12562.
- van Buren, N.; Demmers, M.; van der Heijden, R.; Witlox, F. Towards a Circular Economy: The Role of Dutch Logistics Industries and Governments. *Sustainability (Switzerland)* 2016, 8, 1–17, doi:10.3390/su8070647.
- Wang, N.; Guo, Z.; Meng, F.; Wang, H.; Yin, J.; Liu, Y. The Circular Economy and Carbon Footprint: A Systematic Accounting for Typical Coal-Fuelled Power Industrial Parks. *JOURNAL OF CLEANER PRODUCTION* 2019, 229, 1262–1273, doi:10.1016/j.jclepro.2019.05.064.
- Wiedenhofer, D.; Fishman, T.; Lauk, C.; Haas, W.; Krausmann, F. Integrating Material Stock Dynamics Into Economy-Wide Material Flow Accounting: Concepts, Modelling, and Global Application for 1900-2050. *ECOLOGICAL ECONOMICS* 2019, 156, 121–133, doi:10.1016/j.ecolecon.2018.09.010.
- Zijm, H.; Klumpp, M. Logistics and Supply Chain Management: Developments and Trends. In *Logistics and Supply Chain Innovation: Bridging the Gap between Theory and Practice*; Springer International Publishing, 2015. Cham, Switzerland; pp. 1–20 ISBN 9783319222882.

---

## Framework

---

- Akanbi, L.A.; Oyedele, L.O.; Omoteso, K.; Bilal, M.; Akinade, O.O.; Ajayi, A.O.; Delgado, J.M.D.; Owolabi, H.A. Disassembly and Deconstruction Analytics System (D-DAS) for Construction in a Circular Economy. *JOURNAL OF CLEANER PRODUCTION* 2019, 223, 386–396, doi:10.1016/j.jclepro.2019.03.172.
- Akinade, O.O.; Oyedele, L.O. Integrating Construction Supply Chains within a Circular Economy: An ANFIS-Based Waste Analytics System (A-WAS). *JOURNAL OF CLEANER PRODUCTION* 2019, 229, 863–873, doi:10.1016/j.jclepro.2019.04.232.
- Balboa C., C.H.; Domínguez Somonte, M. Circular Economy as an Ecodesign Framework: The ECO III Model. *Informador Técnico* 2014, 78, 82, doi:10.23850/22565035.71.
- Barreiro-Gen, M.; Lozano, R. How Circular Is the Circular Economy? Analysing the Implementation of Circular Economy in Organisations. *Business Strategy and the Environment* 2020, 29, 3484–3494, doi:10.1002/bse.2590.
- Bolger, K.; Doyon, A. Circular Cities: Exploring Local Government Strategies to Facilitate a Circular Economy. *European Planning Studies* 2019, 27, 2184–2205, doi:10.1080/09654313.2019.1642854.
-

- 
- Budzianowski, W.M. Implementing Carbon Capture, Utilisation and Storage in the Circular Economy. *International Journal of Global Warming* 2017, 12, 272, doi:10.1504/IJGW.2017.10005407.
- de Angelis, R. Circular Economy: Laying the Foundations for Conceptual and Theoretical Development in Management Studies. *MANAGEMENT DECISION* 2021, 59, 1209–1227, doi:10.1108/MD-05-2019-0587.
- de Oliveira, C.T.; Dantas, T.E.T.; Soares, S.R. Nano and Micro Level Circular Economy Indicators: Assisting Decision-Makers in Circularity Assessments. *Sustainable Production and Consumption* 2021, 26, 455–468, doi:10.1016/j.spc.2020.11.024.
- Du, Z. Planning Framework of the Circular Economy Eco-City; 2016; Vol. 41;.
- Figge, F.; Thorpe, A.S.; Givry, P.; Canning, L.; Franklin-Johnson, E. Longevity and Circularity as Indicators of Eco-Efficient Resource Use in the Circular Economy. *Ecological Economics* 2018, 150, 297–306, doi:10.1016/j.ecolecon.2018.04.030.
- Franklin-Johnson, E.; Figge, F.; Canning, L. Resource Duration as a Managerial Indicator for Circular Economy Performance. *Journal of Cleaner Production* 2016, 133, 589–598, doi:10.1016/j.jclepro.2016.05.023.
- George, D.A.R.; ang Lin, B.C.; Chen, Y. A Circular Economy Model of Economic Growth. *Environmental Modelling and Software* 2015, 73, 60–63, doi:10.1016/j.envsoft.2015.06.014.
- Hoogmartens, R.; Eyckmans, J.; van Passel, S. A Hotelling Model for the Circular Economy Including Recycling, Substitution and Waste Accumulation. *Resources, Conservation and Recycling* 2018, 128, 98–109, doi:10.1016/j.resconrec.2017.09.015.
- Iacovidou, E.; Millward-Hopkins, J.; Busch, J.; Purnell, P.; Velis, C.A.; Hahladakis, J.N.; Zwirner, O.; Brown, A. A Pathway to Circular Economy: Developing a Conceptual Framework for Complex Value Assessment of Resources Recovered from Waste. *Journal of Cleaner Production* 2017, 168, 1279–1288, doi:10.1016/j.jclepro.2017.09.002.
- Jato-Espino, D.; Ruiz-Puente, C. Fostering Circular Economy Through the Analysis of Existing Open Access Industrial Symbiosis Databases. *SUSTAINABILITY* 2020, 12, doi:10.3390/su12030952.
- Katz-Gerro, T.; Lopez Sintas, J. Mapping Circular Economy Activities in the European Union: Patterns of Implementation and Their Correlates in Small and Medium-Sized Enterprises. *BUSINESS STRATEGY AND THE ENVIRONMENT* 2019, 28, 485–496, doi:10.1002/bse.2259.
- Lieder, M.; Asif, F.M.A.; Rashid, A. Towards Circular Economy Implementation: An Agent-Based Simulation Approach for Business Model Changes. *Autonomous Agents and Multi-Agent Systems* 2017, 31, 1377–1402, doi:10.1007/s10458-017-9365-9.
- Liu, C.; Côté, R. A Framework for Integrating Ecosystem Services into China's Circular Economy: The Case of Eco-Industrial Parks. *Sustainability (Switzerland)* 2017, 9, doi:10.3390/su9091510.
- Lozano, R. Analysing the Use of Tools, Initiatives, and Approaches to Promote Sustainability in Corporations. *Corporate Social Responsibility and Environmental Management* 2020, 27, 982–998, doi:10.1002/csr.1860.
- Manninen, K.; Koskela, S.; Antikainen, R.; Bocken, N.; Dahlbo, H.; Aminoff, A. Do Circular Economy Business Models Capture Intended Environmental Value Propositions? *Journal of Cleaner Production* 2018, 171, 413–422, doi:10.1016/j.jclepro.2017.10.003.
- Maitre-Ekern, E. The Choice of Regulatory Instruments for a Circular Economy. *Environmental Law and Economics* 2017, 305–334, doi:10.1007/978-3-319-50932-7\_12.
- Mathews, J.A.; Tang, Y.; Tan, H. China's Move to a Circular Economy as a Development Strategy. *Asian Business and Management* 2011, 10, 463–484, doi:10.1057/abm.2011.18.
- Mathews, J.A.; Tan, H. Progress toward a Circular Economy in China: The Drivers (and Inhibitors) of Eco-Industrial Initiative. *Journal of Industrial Ecology* 2011, 15, 435–457, doi:10.1111/j.1530-9290.2011.00332.x.
- Mendoza, J.M.F.; Sharmina, M.; Gallego-Schmid, A.; Heyes, G.; Azapagic, A. Integrating Backcasting and Eco-Design for the Circular Economy: The BECE Framework. *Journal of Industrial Ecology* 2017, 21, 526–544, doi:10.1111/jiec.12590.
- Mishenin, Y.; Koblianska, I.; Medvid, V.; Maistrenko, Y. Sustainable Regional Development Policy Formation: Role of Industrial Ecology and Logistics. *Entrepreneurship and Sustainability Issues* 2018, 6, 329–341, doi:10.9770/jesi.2018.6.1(20).
- Molina-Moreno, V.; Leyva-Díaz, J.C.; Sánchez-Molina, J.; Peña-García, A. Proposal to Foster Sustainability through Circular Economy-Based Engineering: A Profitable Chain from Waste Management to Tunnel Lighting. *Sustainability (Switzerland)* 2017, 9, doi:10.3390/su9122229.
- Mylan, J.; Holmes, H.; Paddock, J. Re-Introducing Consumption to the “Circular Economy”: A Sociotechnical Analysis of Domestic Food Provisioning. *Sustainability (Switzerland)* 2016, 8, doi:10.3390/su8080794.
- Neramballi, A.; Sakao, T.; Willskytt, S.; Tillman, A.-M. A Design Navigator to Guide the Transition towards Environmentally Benign Product/Service Systems Based on LCA Results. *JOURNAL OF CLEANER PRODUCTION* 2020, 277, doi:10.1016/j.jclepro.2020.124074.
- Onete, C.B.; Albăstroi, I.; Dina, R. Reuse of Electronic Equipment and Software Installed on Them - An Exploratory Analysis in the Context of Circular Economy. *Amfiteatru Economic* 2018, 20, 325–339, doi:10.24818/EA/2018/48/325.
- Pagotto, M.; Halog, A. Towards a Circular Economy in Australian Agri-Food Industry: An Application of Input-Output Oriented Approaches for Analyzing Resource Efficiency and Competitiveness Potential. *Journal of Industrial Ecology* 2016, 20, 1176–1186, doi:10.1111/jiec.12373.
- Parajuly, K.; Wenzel, H. Product Family Approach in E-Waste Management: A Conceptual Framework for Circular Economy. *Sustainability* 2017, 9, 768, doi:10.3390/su9050768.
- Park, J.; Sarkis, J.; Wu, Z. Creating Integrated Business and Environmental Value within the Context of China's Circular Economy and Ecological Modernization. *Journal of Cleaner Production* 2010, 18, 1492–1499, doi:10.1016/j.jclepro.2010.06.001.
-

- Pelău, C.; Chinie, A.C. Econometric Model for Measuring the Impact of the Education Level of the Population on the Recycling Rate in a Circular Economy. *Amfiteatru Economic* 2018, 20, 340–355, doi:10.24818/EA/2018/48/340.
- Polverini, D.; Miretti, U. An Approach for the Techno-Economic Assessment of Circular Economy Requirements under the Ecodesign Directive. *RESOURCES CONSERVATION AND RECYCLING* 2019, 150, doi:10.1016/j.resconrec.2019.104425.
- Scarpellini, S.; Valero-Gil, J.; Moneva, J.M.; Andreus, M. Environmental Management Capabilities for a "circular Eco-Innovation". *BUSINESS STRATEGY AND THE ENVIRONMENT* 2020, 29, 1850–1864, doi:10.1002/bse.2472.
- Silk, D.; Mazzali, B.; Gargalo, C.L.; Pinelo, M.; Udugama, I.A.; Mansouri, S.S. A Decision-Support Framework for Techno-Economic Sustainability Assessment of Resource Recovery Alternatives. *JOURNAL OF CLEANER PRODUCTION* 2020, 266, doi:10.1016/j.jclepro.2020.121854.
- Steuer, B. Identifying Effective Institutions for China's Circular Economy: Bottom-up Evidence from Waste Management. *WASTE MANAGEMENT & RESEARCH* 2021, 39, 937–946, doi:10.1177/0734242X20972796.
- Wang, P.; Che, F.; Fan, S.; Gu, C. Ownership Governance, Institutional Pressures and Circular Economy Accounting Information Disclosure. *Chinese Management Studies* 2014, 8, 487–501, doi:10.1108/CMS-10-2013-0192.
- Winkler, H. Closed-Loop Production Systems—A Sustainable Supply Chain Approach. *CIRP Journal of Manufacturing Science and Technology* 2011, 4, 243–246, doi:10.1016/j.cirpj.2011.05.001.
- Witjes, S.; Lozano, R. Towards a More Circular Economy: Proposing a Framework Linking Sustainable Public Procurement and Sustainable Business Models. *Resources, Conservation and Recycling* 2016, 112, 37–44, doi:10.1016/j.resconrec.2016.04.015.
- Zhong, S.; Pearce, J.M. Tightening the Loop on the Circular Economy: Coupled Distributed Recycling and Manufacturing with Recyclebot and RepRap 3-D Printing. *Resources, Conservation and Recycling* 2018, 128, 48–58, doi:10.1016/j.resconrec.2017.09.023.
- Zink, T.; Geyer, R. Circular Economy Rebound. *Journal of Industrial Ecology* 2017, 21, 593–602, doi:10.1111/jiec.12545.

### Case Study

- Ali, A.K.; Wang, Y.; Alvarado, J.L. Facilitating Industrial Symbiosis to Achieve Circular Economy Using Value-Added by Design: A Case Study in Transforming the Automobile Industry Sheet Metal Waste-Flow into Voronoi Facade Systems. *JOURNAL OF CLEANER PRODUCTION* 2019, 234, 1033–1044, doi:10.1016/j.jclepro.2019.06.202.
- Bakker, C.; Wang, F.; Huisman, J.; den Hollander, M. Products That Go Round: Exploring Product Life Extension through Design. *Journal of Cleaner Production* 2014, 69, 10–16, doi:10.1016/j.jclepro.2014.01.028.
- Borrello, M.; Caracciolo, F.; Lombardi, A.; Pascucci, S.; Cembalo, L. Consumers' Perspective on Circular Economy Strategy for Reducing Food Waste. *Sustainability (Switzerland)* 2017, 9, doi:10.3390/su9010141.
- Buil, P.; Roger-Loppacher, O.; Selvam, R.M.; Prieto-Sandoval, V. The Involvement of Future Generations in the Circular Economy Paradigm: An Empirical Analysis on Aluminium Packaging Recycling in Spain. *Sustainability (Switzerland)* 2017, 9, doi:10.3390/su9122345.
- de los Rios, I.C.; Charnley, F.J.S. Skills and Capabilities for a Sustainable and Circular Economy: The Changing Role of Design. *Journal of Cleaner Production* 2017, 160, 109–122, doi:10.1016/j.jclepro.2016.10.130.
- de Vecchio, P. del; Passiante, G.; Barberio, G.; Innella, C. Digital Innovation Ecosystems for Circular Economy: The Case of ICESP, the Italian Circular Economy Stakeholder Platform. *INTERNATIONAL JOURNAL OF INNOVATION AND TECHNOLOGY MANAGEMENT* 2021, 18, doi:10.1142/S0219877020500534.
- Despeisse, M.; Baumers, M.; Brown, P.; Charnley, F.; Ford, S.J.; Garmulewicz, A.; Knowles, S.; Minshall, T.H.W.; Mortara, L.; Reed-Tsochas, F.P.; et al. Unlocking Value for a Circular Economy through 3D Printing: A Research Agenda. *Technological Forecasting and Social Change* 2017, 115, 75–84, doi:10.1016/J.TECHFORE.2016.09.021.
- Deutz, P.; Baxter, H.; Gibbs, D.; Mayes, W.M.; Gomes, H.I. Resource Recovery and Remediation of Highly Alkaline Residues: A Political-Industrial Ecology Approach to Building a Circular Economy. *Geoforum* 2017, 85, 336–344, doi:10.1016/j.geoforum.2017.03.021.
- Dieckmann, E.; Sheldrick, L.; Tennant, M.; Myers, R.; Cheeseman, C. Analysis of Barriers to Transitioning from a Linear to a Circular Economy for End of Life Materials: A Case Study for Waste Feathers. *SUSTAINABILITY* 2020, 12, doi:10.3390/su12051725.
- Dong, S.; Wang, Z.; Li, Y.; Li, F.; Li, Z.; Chen, F.; Cheng, H. Assessment of Comprehensive Effects and Optimization of a Circular Economy System of Coal Power and Cement in Kongtong District, Pingliang City, Gansu Province, China. *Sustainability (Switzerland)* 2017, 9, doi:10.3390/su9050787.
- Fang, K.; Dong, L.; Ren, J.; Zhang, Q.; Han, L.; Fu, H. Carbon Footprints of Urban Transition: Tracking Circular Economy Promotions in Guiyang, China. *Ecological Modelling* 2017, 365, 30–44, doi:10.1016/j.ecolmodel.2017.09.024.
- Farooque, M.; Zhang, A.; Liu, Y. Barriers to Circular Food Supply Chains in China. *SUPPLY CHAIN MANAGEMENT-AN INTERNATIONAL JOURNAL* 2019, 24, 677–696, doi:10.1108/SCM-10-2018-0345.
- Fischer, A.; Pascucci, S. Institutional Incentives in Circular Economy Transition: The Case of Material Use in the Dutch Textile Industry. *Journal of Cleaner Production* 2017, 155, 17–32, doi:10.1016/j.jclepro.2016.12.038.
- Franco, M.A. Circular Economy at the Micro Level: A Dynamic View of Incumbents' Struggles and Challenges in the Textile Industry. *Journal of Cleaner Production* 2017, 168, 833–845, doi:10.1016/j.jclepro.2017.09.056.
- Garmulewicz, A.; Holweg, M.; Veldhuis, H.; Yang, A. Disruptive Technology as an Enabler of the Circular Economy: What Potential Does 3D Printing Hold? *California Management Review* 2018, 60, 112–132, doi:10.1177/0008125617752695.

- 
- Genovese, A.; Acquaye, A.A.; Figueroa, A.; Omega, S.C.L.K.-; undefined 2017 Sustainable Supply Chain Management and the Transition towards a Circular Economy: Evidence and Some Applications. Elsevier.
- Ghența, M.; Matei, A. Smes and the Circular Economy: From Policy to Difficulties Encountered during Implementation. *Amfiteatru Economic* 2018, 20, 294–309, doi:10.24818/EA/2018/48/294.
- Giurea, R.; Ioan, A.M.; Ragazzi, M.; Cioca, L.I. Focusing Agro-Tourism Structures for Environmental Optimization. *Quality - Access to Success* 2017, 18, 115–120.
- Gregson, N.; Crang, M.; Fuller, S.; Holmes, H. Interrogating the Circular Economy: The Moral Economy of Resource Recovery in the EU. *Economy and Society* 2015, 44, 218–243, doi:10.1080/03085147.2015.1013353.
- Guerin, T.F. Assessing Technical Options for Handling Packaging Wastes from Construction of a Solar PV Powerstation: A Case Study from a Remote Site. *WATER AIR AND SOIL POLLUTION* 2020, 231, doi:10.1007/s11270-020-04604-z.
- Haas, W.; Krausmann, F.; Wiedenhofer, D.; Heinz, M. How Circular Is the Global Economy?: An Assessment of Material Flows, Waste Production, and Recycling in the European Union and the World in 2005. *Journal of Industrial Ecology* 2015, 19, 765–777, doi:10.1111/jiec.12244.
- Haddaway, N.R.; Johannesdottir, S.L.; Piniewski, M.; Macura, B. What Ecotechnologies Exist for Recycling Carbon and Nutrients from Domestic Wastewater? A Systematic Map Protocol. *ENVIRONMENTAL EVIDENCE* 2019, 8, doi:10.1186/s13750-018-0145-z.
- Haupt, M.; Hellweg, S. Measuring the Environmental Sustainability of a Circular Economy. *ENVIRONMENTAL AND SUSTAINABILITY INDICATORS* 2019, 1–2, doi:10.1016/j.indic.2019.100005.
- Hazen, B.T.; Mollenkopf, D.A.; Wang, Y. Remanufacturing for the Circular Economy: An Examination of Consumer Switching Behavior. *Business Strategy and the Environment* 2017, 26, 451–464, doi:10.1002/bse.1929.
- Hobson, K. Closing the Loop or Squaring the Circle? Locating Generative Spaces for the Circular Economy. *Progress in Human Geography* 2016, 40, 88–104, doi:10.1177/0309132514566342.
- Hsieh, Y.C.; Lin, K.Y.; Lu, C.; Rong, K. Governing a Sustainable Business Ecosystem in Taiwan's Circular Economy: The Story of Spring Pool Glass. *Sustainability (Switzerland)* 2017, 9, doi:10.3390/su9061068.
- Ilić, M.; Nikolić, M. Drivers for Development of Circular Economy - A Case Study of Serbia. *Habitat International* 2016, 56, 191–200, doi:10.1016/j.habitatint.2016.06.003.
- Jiao, W.; Boons, F. Policy Durability of Circular Economy in China: A Process Analysis of Policy Translation. *Resources, Conservation and Recycling* 2017, 117, 12–24, doi:10.1016/j.resconrec.2015.10.010.
- Jiménez-Rivero, A.; García-Navarro, J. Best Practices for the Management of End-of-Life Gypsum in a Circular Economy. *Journal of Cleaner Production* 2017, 167, 1335–1344, doi:10.1016/j.jclepro.2017.05.068.
- Kalverkamp, M.; Raabe, T. Automotive Remanufacturing in the Circular Economy in Europe: Marketing System Challenges. *Journal of Macromarketing* 2018, doi:10.1177/0276146717739066.
- Kılış, Ş.; Kılış, B. Integrated Circular Economy and Education Model to Address Aspects of an Energy-Water-Food Nexus in a Dairy Facility and Local Contexts. *Journal of Cleaner Production* 2017, 167, 1084–1098, doi:10.1016/j.jclepro.2017.03.178.
- Lakatos, E.S.; Dan, V.; Cioca, L.I.; Bacali, L.; Ciobanu, A.M. How Supportive Are Romanian Consumers of the Circular Economy Concept: A Survey. *Sustainability (Switzerland)* 2016, 8, doi:10.3390/su8080789.
- Laurieri, N.; Lucchese, A.; Marino, A.; Digiesi, S. A Door-to-Door Waste Collection System Case Study: A Survey on Its Sustainability and Effectiveness. *SUSTAINABILITY* 2020, 12, doi:10.3390/su12145520.
- Li, N.; Zhang, T.; Liang, S. Reutilisation-Extended Material Flows and Circular Economy in China. *Waste Management* 2013, 33, 1552–1560, doi:10.1016/j.wasman.2013.01.029.
- Linder, M.; Williander, M. Circular Business Model Innovation: Inherent Uncertainties. *Business Strategy and the Environment* 2017, 26, 182–196, doi:10.1002/bse.1906.
- Liu, Q.; ming Li, H.; li Zuo, X.; fei Zhang, F.; Wang, L. A Survey and Analysis on Public Awareness and Performance for Promoting Circular Economy in China: A Case Study from Tianjin. *Journal of Cleaner Production* 2009, 17, 265–270, doi:10.1016/j.jclepro.2008.06.003.
- Liu, Y.; Bai, Y. An Exploration of Firms' Awareness and Behavior of Developing Circular Economy: An Empirical Research in China. *Resources, Conservation and Recycling* 2014, 87, 145–152, doi:10.1016/j.resconrec.2014.04.002.
- Ma, S.; Hu, S.; Chen, D.; Zhu, B. A Case Study of a Phosphorus Chemical Firm's Application of Resource Efficiency and Eco-Efficiency in Industrial Metabolism under Circular Economy. *Journal of Cleaner Production* 2015, 87, 839–849, doi:10.1016/j.jclepro.2014.10.059.
- Noya, I.; Aldea, X.; González-García, S.; M. Gasol, C.; Moreira, M.T.; Amores, M.J.; Marín, D.; Boschmonart-Rives, J. Environmental Assessment of the Entire Pork Value Chain in Catalonia – A Strategy to Work towards Circular Economy. *Science of the Total Environment* 2017, 589, 122–129, doi:10.1016/j.scitotenv.2017.02.186.
- Phuluwa, H.S.; Daniyan, I.; Mpofo, K. Development of a Sustainable Decision Framework for the Implementation of End-of-Life (EoL) Options for the Railcar Industry. *ENVIRONMENT DEVELOPMENT AND SUSTAINABILITY* 2021, 23, 9433–9453, doi:10.1007/s10668-020-01035-y.
- Principato, L.; Ruini, L.; Guidi, M.; Secondi, L. Adopting the Circular Economy Approach on Food Loss and Waste: The Case of - Italian Pasta Production. *RESOURCES CONSERVATION AND RECYCLING* 2019, 144, 82–89, doi:10.1016/j.resconrec.2019.01.025.
-

- 
- Rajala, R.; Hakanen, E.; Mattila, J.; Seppälä, T.; Westerlund, M. How Do Intelligent Goods Shape Closed-Loop Systems? *California Management Review* 2018, 60, 20–44, doi:10.1177/0008125618759685.
- Rehberger, M.; Hiete, M. Allocation of Environmental Impacts in Circular and Cascade Use of Resources-Incentive-Driven Allocation as a Prerequisite for Cascade Persistence. *SUSTAINABILITY* 2020, 12, doi:10.3390/su12114366.
- Rizos, V.; Behrens, A.; van der Gaast, W.; Hofman, E.; Ioannou, A.; Kafyeke, T.; Flamos, A.; Rinaldi, R.; Papadelis, S.; Hirschnitz-Garbers, M.; et al. Implementation of Circular Economy Business Models by Small and Medium-Sized Enterprises (SMEs): Barriers and Enablers. *Sustainability (Switzerland)* 2016, 8, doi:10.3390/su8111212.
- Ruggieri, A.; Braccini, A.M.; Poponi, S.; Mosconi, E.M. A Meta-Model of Inter-Organisational Cooperation for the Transition to a Circular Economy. *Sustainability (Switzerland)* 2016, 8, 1–17, doi:10.3390/su8111153.
- Scheepens, A.E.; Vogtländer, J.G.; Brezet, J.C. Two Life Cycle Assessment (LCA) Based Methods to Analyse and Design Complex (Regional) Circular Economy Systems. Case: Making Water Tourism More Sustainable. *Journal of Cleaner Production* 2016, 114, 257–268, doi:10.1016/j.jclepro.2015.05.075.
- Schneider, P.; Anh, L.H.; Wagner, J.; Reichenbach, J.; Hebner, A. Solid Waste Management in Ho Chi Minh City, Vietnam: Moving towards a Circular Economy? *Sustainability (Switzerland)* 2017, 9, doi:10.3390/su9020286.
- Spring, M.; Araujo, L. Product Biographies in Servitization and the Circular Economy. *Industrial Marketing Management* 2017, 60, 126–137, doi:10.1016/J.INDMARMAN.2016.07.001.
- Strazza, C.; Magrassi, F.; Gallo, M.; del Borghi, A. Life Cycle Assessment from Food to Food: A Case Study of Circular Economy from Cruise Ships to Aquaculture. *Sustainable Production and Consumption* 2015, 2, doi:10.1016/j.spc.2015.06.004.
- Tsiliyannis, C.A. Markov Chain Modeling and Forecasting of Product Returns in Remanufacturing Based on Stock Mean-Age. *European Journal of Operational Research* 2018, 271, 474–489, doi:10.1016/j.ejor.2018.05.026.
- Uche-Soria, M.; Rodriguez-Monroy, C. An Efficient Waste-To-Energy Model in Isolated Environments. Case Study: La Gomera (Canary Islands). *SUSTAINABILITY* 2019, 11, doi:10.3390/su11113198.
- Urbinati, A.; Chiaroni, D.; Chiesa, V. Towards a New Taxonomy of Circular Economy Business Models. *Journal of Cleaner Production* 2017, 168, 487–498, doi:10.1016/j.jclepro.2017.09.047.
- Veleva, V.; Bodkin, G.; Todorova, S. The Need for Better Measurement and Employee Engagement to Advance a Circular Economy: Lessons from Biogen's "Zero Waste" Journey. *Journal of Cleaner Production* 2017, 154, 517–529, doi:10.1016/j.jclepro.2017.03.177.
- Viles, E.; Santos, J.; Arevalo, T.F.; Tanco, M.; Kalemkerian, F. A New Mindset for Circular Economy Strategies: Case Studies of Circularity in the Use of Water. *SUSTAINABILITY* 2020, 12, doi:10.3390/su12229781.
- Wieser, H. Beyond Planned Obsolescence: Product Lifespans and the Challenges to a Circular Economy. *GAIA* 2016, 25, 156–160, doi:10.14512/gaia.25.3.5.
- Wieser, H.; Tröger, N. Exploring the Inner Loops of the Circular Economy: Replacement, Repair, and Reuse of Mobile Phones in Austria. *Journal of Cleaner Production* 2016, 172, 3042–3055, doi:10.1016/j.jclepro.2017.11.106.
- Wu, H.Q.; Shi, Y.; Xia, Q.; Zhu, W.D. Effectiveness of the Policy of Circular Economy in China: A DEA-Based Analysis for the Period of 11th Five-Year-Plan. *Resources, Conservation and Recycling* 2014, 83, 163–175, doi:10.1016/j.resconrec.2013.10.003.
- Xue, B.; Chen, X.P.; Geng, Y.; Guo, X.J.; Lu, C.P.; Zhang, Z.L.; Lu, C.Y. Survey of Officials' Awareness on Circular Economy Development in China: Based on Municipal and County Level. *Resources, Conservation and Recycling* 2010, 54, 1296–1302, doi:10.1016/j.resconrec.2010.05.010.
- Yu, H.-C.; Kuo, L.; Kao, M.-F. The Relationship between CSR Disclosure and Competitive Advantage. *Sustainability Accounting, Management and Policy Journal* 2017, 8, 547–570, doi:10.1108/SAMPJ-11-2016-0086.
- Zamfir, A.-M.; Mocanu, C.; Grigorescu, A. Circular Economy and Decision Models among European SMEs. *Sustainability* 2017, 9, 1507, doi:10.3390/su9091507.
- Zeng, H.; Chen, X.; Xiao, X.; Zhou, Z. Institutional Pressures, Sustainable Supply Chain Management, and Circular Economy Capability: Empirical Evidence from Chinese Eco-Industrial Park Firms. *Journal of Cleaner Production* 2017, 155, 54–65, doi:10.1016/j.jclepro.2016.10.093.
- Zhu, Q.; Geng, Y.; Hung Lai, K. Circular Economy Practices among Chinese Manufacturers Varying in Environmental-Oriented Supply Chain Cooperation and the Performance Implications. *Journal of Environmental Management* 2010, 91, 1324–1331, doi:10.1016/j.jenvman.2010.02.013.
-

**Table S2: Systematic review table with some examples**

As the analysis is too extensive, in this table are introduced two examples of how the systematic review was made and how it was incorporated to the analysis.

| Authors and Year      | Theme/Focus                                      | Theories                                     | Methodologies                                                                                                                                           | Sample/Kind/Terms                                     | Key Findings/Analysis                                                                                                                                                                                                                                                                                                                                                                                                                                                                                                                                    |
|-----------------------|--------------------------------------------------|----------------------------------------------|---------------------------------------------------------------------------------------------------------------------------------------------------------|-------------------------------------------------------|----------------------------------------------------------------------------------------------------------------------------------------------------------------------------------------------------------------------------------------------------------------------------------------------------------------------------------------------------------------------------------------------------------------------------------------------------------------------------------------------------------------------------------------------------------|
| Linder et al 2017     | Limitations and case study                       | Closed Loop and Circular economy limitations | Case Study                                                                                                                                              | 104 people                                            | <ul style="list-style-type: none"> <li>–The study was aligned with the customer development principles</li> <li>–After a short period of time the introduction of a CLS was suspended</li> <li>–It defines its limitations and try to measure it. Stating which limitations has been encountered alongside the study case saying if they have been relevant as expected or irrelevant</li> </ul>                                                                                                                                                         |
| Pero Hazen et al 2017 | Consumer behavior, limitations and opportunities | Push pull morong (CLP) & circular economy    | Econometric model and Interviews                                                                                                                        | 633 students                                          | <ul style="list-style-type: none"> <li>–Consumer attitude it's the main trouble of CLP dissemination</li> <li>–The assimilation of a refurbished product is not well perceived by customers</li> <li>–Increasing price level of different new products may stimulate the adoption of refurbished</li> <li>–Remanufactured products are totally accepted by people who really knows what this means</li> <li>–The study aims to analyse the full lifecycle to determine if refurbishment is always eco-efficient (When is not eco efficient??)</li> </ul> |
| Korhonen et al. 2017  | Concept and limitations, Literature review       | CE vision from WCED (Brundtland)             | <ul style="list-style-type: none"> <li>–WCED platform to define CE</li> <li>–CE Concept form the perspective of Environmental sustainability</li> </ul> | Term: Industrial ecology                              | <ul style="list-style-type: none"> <li>–CE stimulation derives from European legislation and public laws, as well as main challenges and changes</li> <li>–CE concept has not been developed and it has been designed and stated by practitioners exclusively</li> <li>–It exposes advantages from CE using the input–output perspective</li> <li>–Defines some limitations at the moment of applying a Closed loop system (Physical flows, thermodynamics, inter/intra business conflict)</li> </ul>                                                    |
| Kopnina 2017          | Literature review                                | Sharing Economy Cradle to cradle             | Content analysis                                                                                                                                        | Cradle to cradle, biomimicry, consumer choice editing | <ul style="list-style-type: none"> <li>–Sustainability requires a constant number of inhabitants in the world</li> <li>– Increase the diffusion of best practices in industries</li> <li>–Regulatory movements arise the number of CSR adopters</li> <li>–Programmed obsolescence</li> <li>–Human behavior, cheap products purchase instead of the most durable. Educational TROUBLE</li> <li>–Service or utility is what must be sold instead of the product itself</li> </ul>                                                                          |
